# Supplementary material for: A New Meroterpene, A New Benzofuran Derivative and Other Constituents from Cultures of the Marine Sponge-Associated Fungus Acremonium persicinum KUFA 1007 and Their Anticholinesterase Activities
Source: PubMed Central journal article supplement (PMC6628235; doi:10.3390/md17060379), 2019-06-25
Supplement: marinedrugs-17-00379-s001.pdf [file marinedrugs-17-00379-s001.pdf]

## Supplementary Materials

### **A New Meroterpene, A New Benzofuran Derivative and Other Constituents from Cultures of the Marine Sponge-Associated Fungus *Acremonium persicinum* KUFA 1007 and Their Anticholinesterase Activities**

Ana J. S. Alves <sup>1,2</sup>, José A. Pereira <sup>2,3</sup>, Tida Dethoup <sup>4</sup>, Sara Cravo <sup>1,3</sup>, Sharad Mistry<sup>5</sup>, Artur M. S. Silva <sup>6</sup>, Madalena M. M. Pinto <sup>3\*</sup> and Anake Kijjoa <sup>2,3\*</sup>

<sup>1</sup> Laboratório de Química Orgânica, Departamento de Ciências Químicas, Faculdade de Farmácia, Universidade do Porto, Rua de Jorge Viterbo Ferreira, 228, 4050-313 Porto, Portugal. E-mail: [anajoao93@hotmail.com](mailto:anajoao93@hotmail.com) (A. J. S. A), [scravo@ff.up.pt](mailto:scravo@ff.up.pt) (S. C.)

<sup>2</sup> ICBAS-Instituto de Ciências Biomédicas Abel Salazar, Rua de Jorge Viterbo Ferreira, 228, 4050-313 Porto, Portugal. E-mail: [jpereira@icbas.up.pt](mailto:jpereira@icbas.up.pt) (J. A. P.)

<sup>3</sup> Interdisciplinary Centre of Marine and Environmental Research (CIIMAR), Terminal de Cruzeiros do Porto de Lexões, Av. General Norton de Matos s/n, 4450-208 Matosinhos, Portugal. E-mail: [madalena@ff.up.pt](mailto:madalena@ff.up.pt).

<sup>4</sup> Department of Plant Pathology, Faculty of Agriculture, Kasetsart University, Bangkok 10240, Thailand. E-mail: [tdethoup@yahoo.com](mailto:tdethoup@yahoo.com).

<sup>5</sup> Department of Chemistry, University of Leicester, University Road, Leicester LE 7 RH, UK. E-mail: [scm11@leicester.ac.uk](mailto:scm11@leicester.ac.uk).

<sup>6</sup> Departamento de Química & QOPNA, Universidade de Aveiro, 3810-193 Aveiro, Portugal. E-mail: [artur.silva@ua.pt](mailto:artur.silva@ua.pt).

\*Correspondence: [ankijjoa@icbas.up.pt](mailto:ankijjoa@icbas.up.pt) (A. K.); [madalena@ff.up.pt](mailto:madalena@ff.up.pt) (M. P.); Tel.: +351-22-042-8331 (A.K.) and +351-22-042-8331 (M. P.); Fax: +351-22-206-2232 (A.K.) and +351-22-206-2232 (M. P.)

Figure S1. <sup>1</sup>H NMR spectrum of **1** (CDCl<sub>3</sub>, 300.13 MHz).

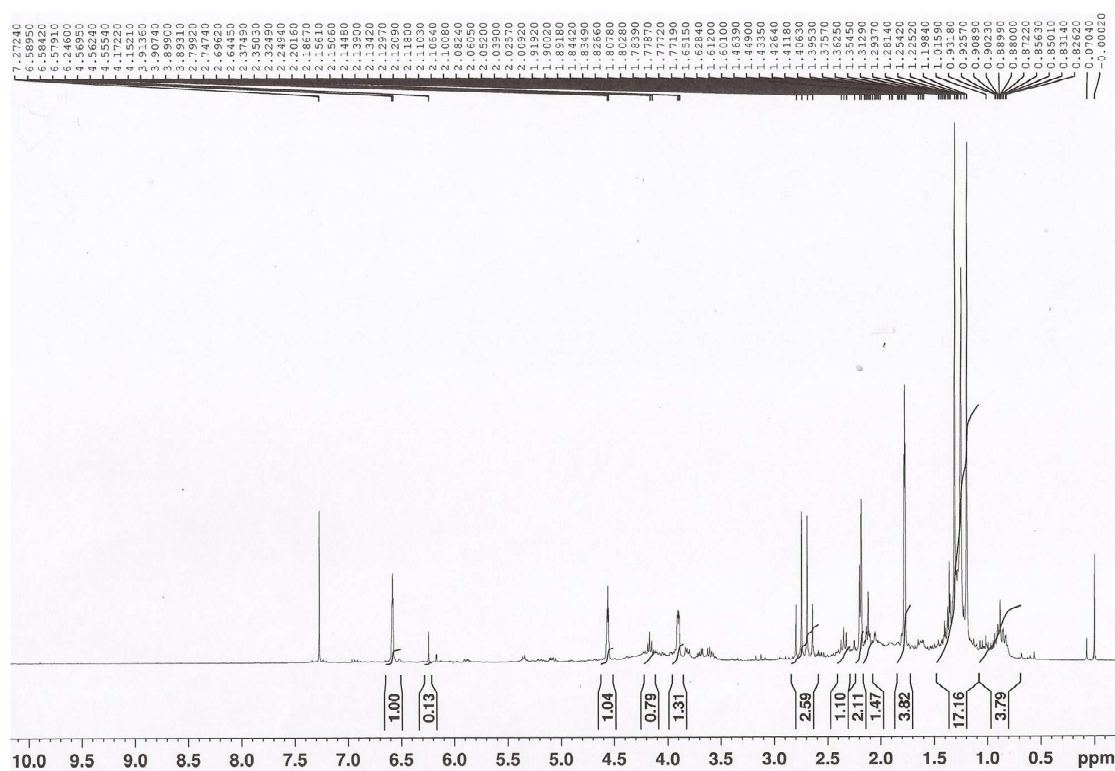

Figure S2. <sup>13</sup>C NMR spectrum of **1** (CDCl<sub>3</sub>, 75.4 MHz).

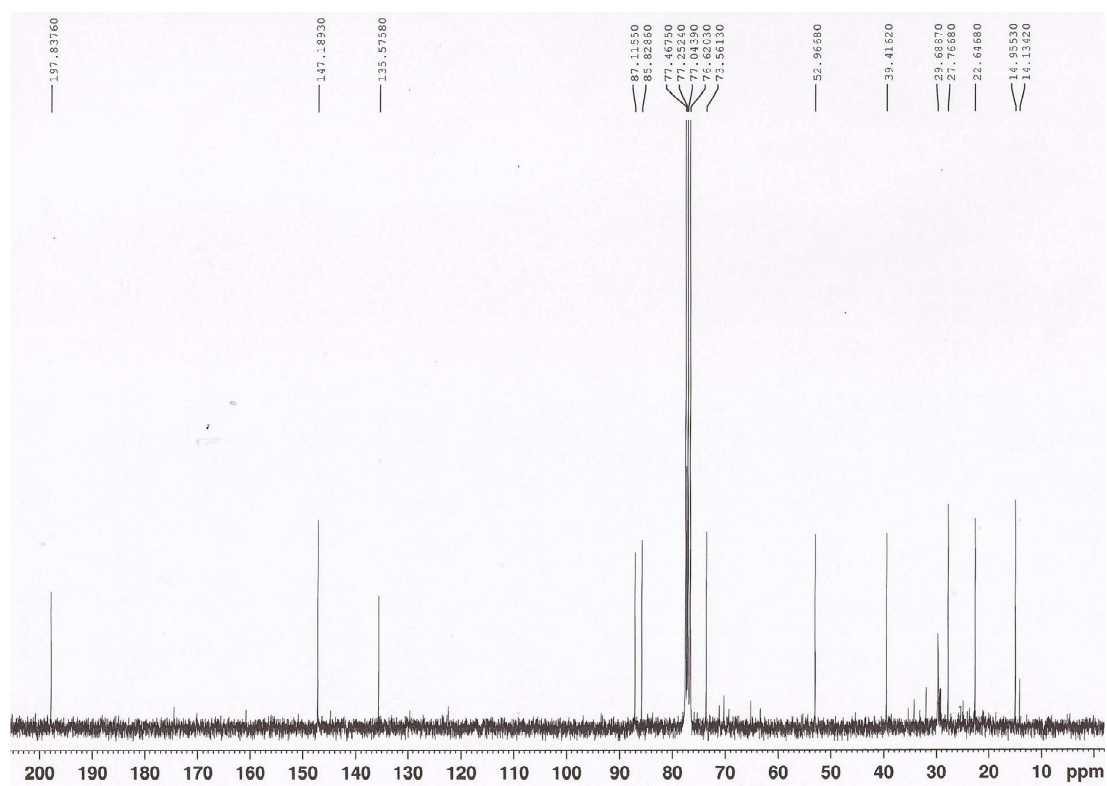

**Figure S3.** DEPT 135° spectrum of **1** (CDCl<sub>3</sub>, 75.4 MHz).

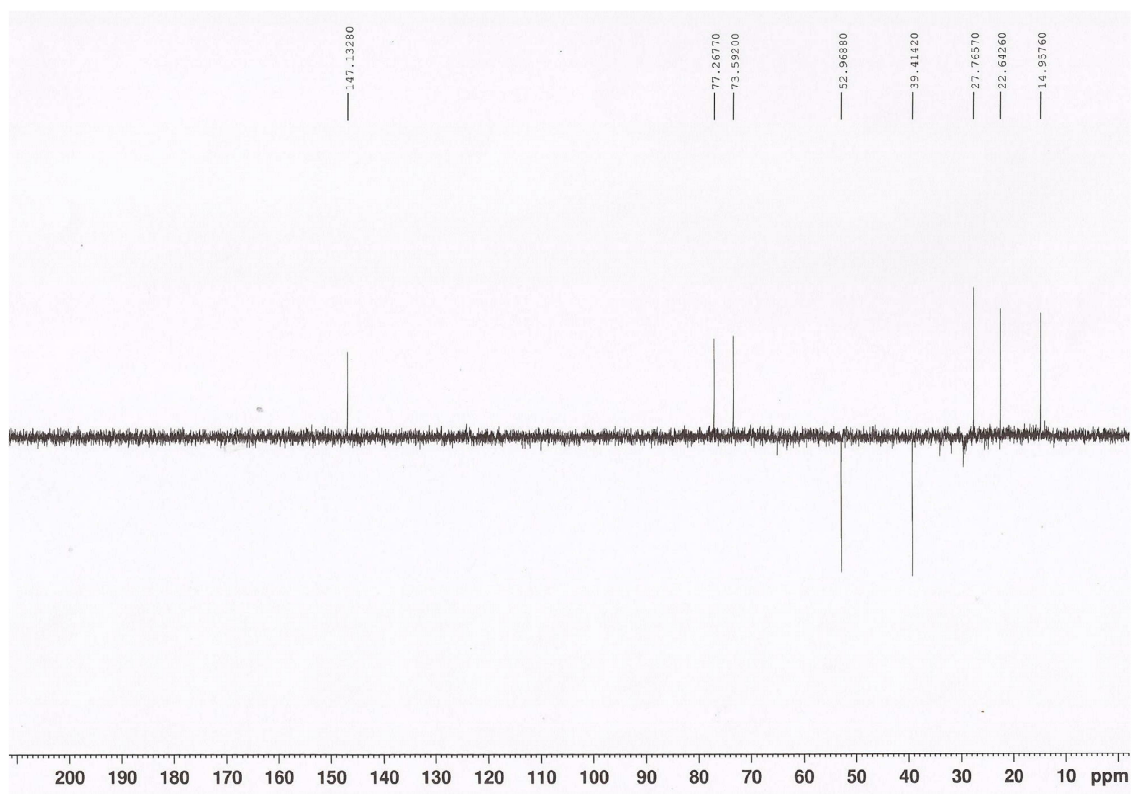

**Figure S4.** DEPT 90° spectrum of **1** (CDCl<sub>3</sub>, 75.4 MHz).

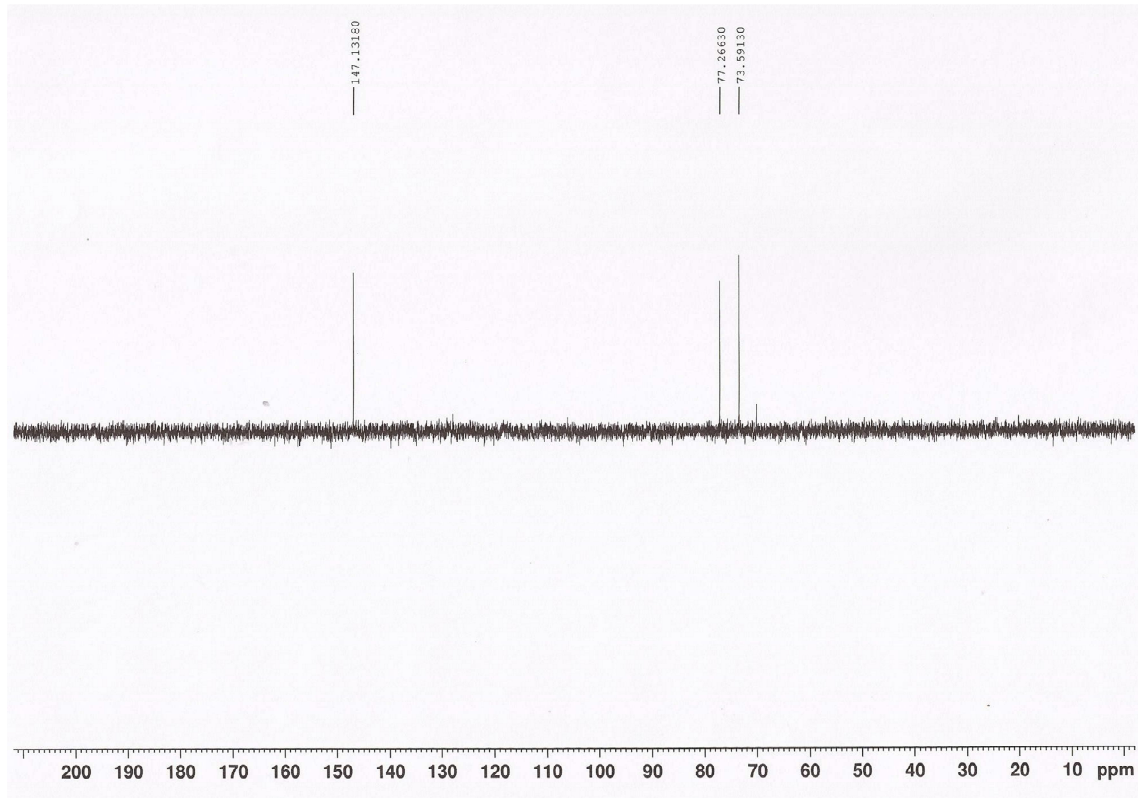

**Figure S5.** COSY spectrum of **1** (CDCl<sub>3</sub>, 300.13 MHz).

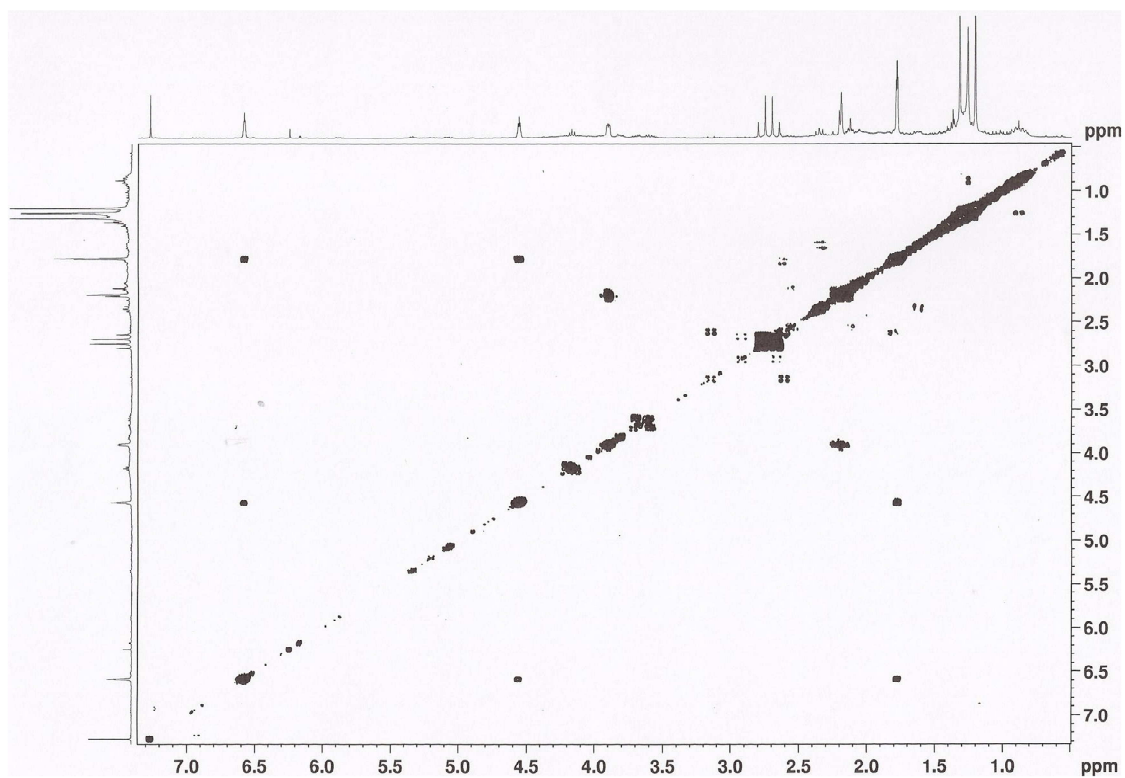

**Figure S6.** HSQC spectrum of **1** (CDCl<sub>3</sub>, 300.13 MHz).

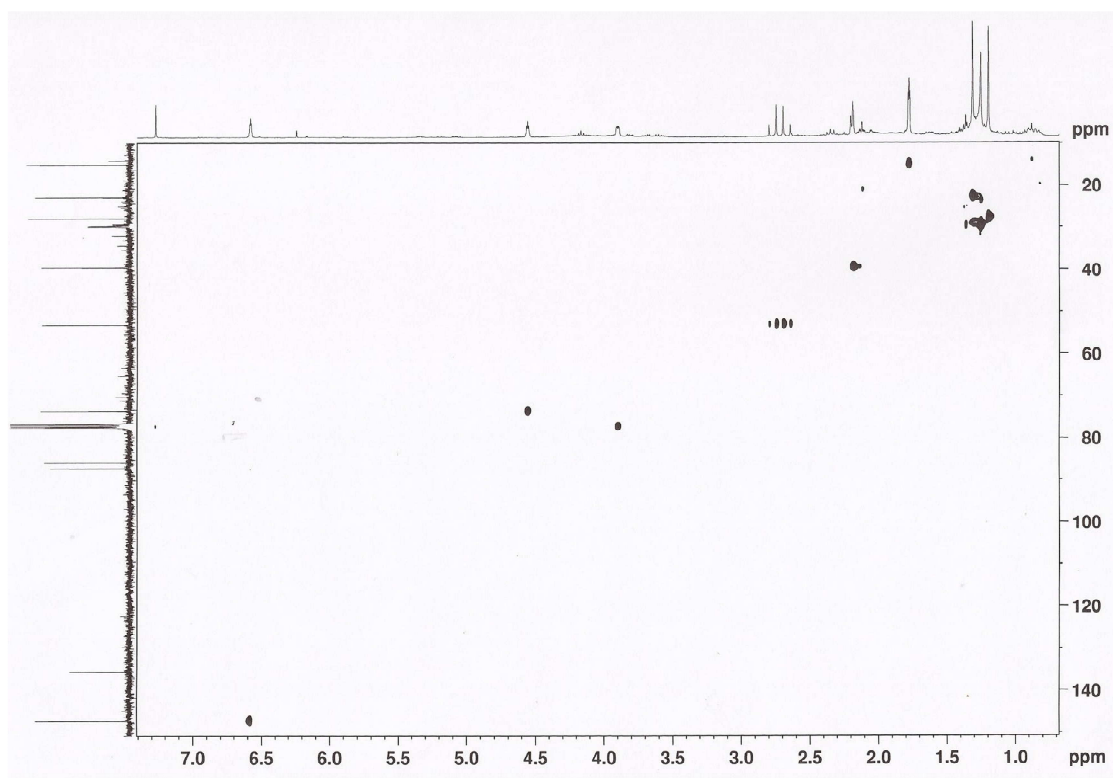

**Figure S7.** HMBC spectrum of **1** (CDCl<sub>3</sub>, 300.13 MHz).

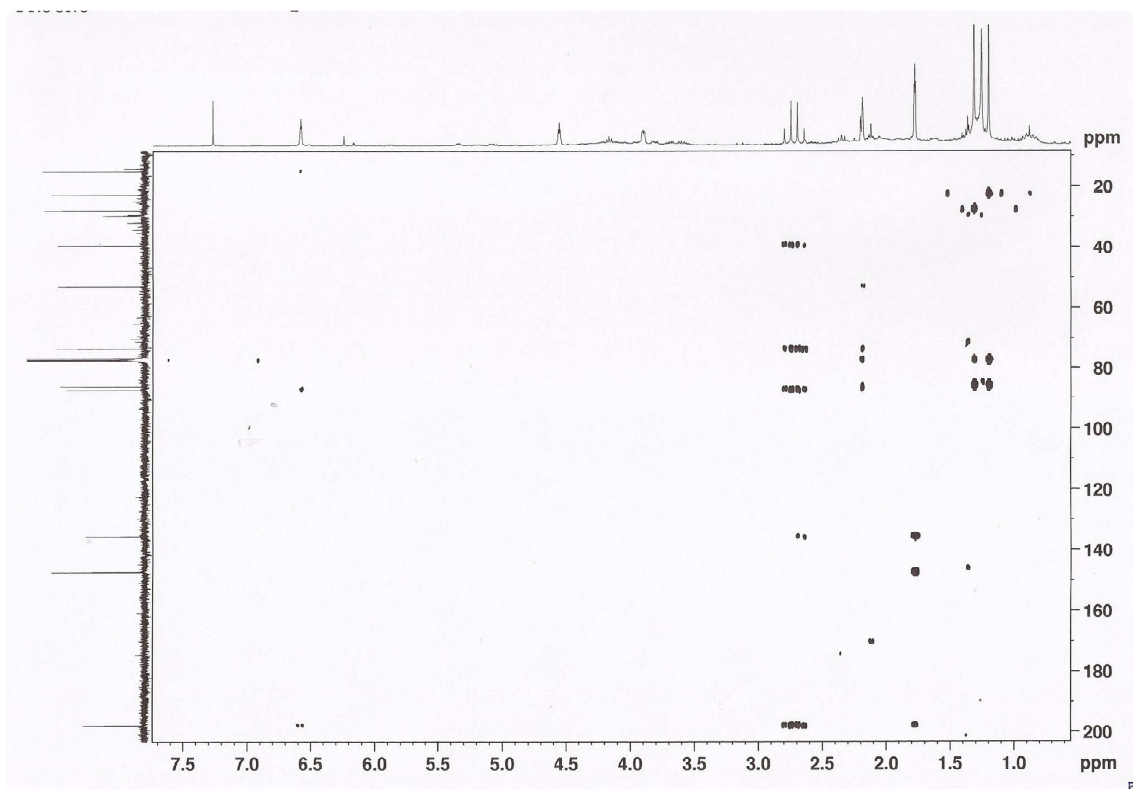

**Figure S8.** ROESY spectrum of **1** (CDCl<sub>3</sub>, 500 MHz).

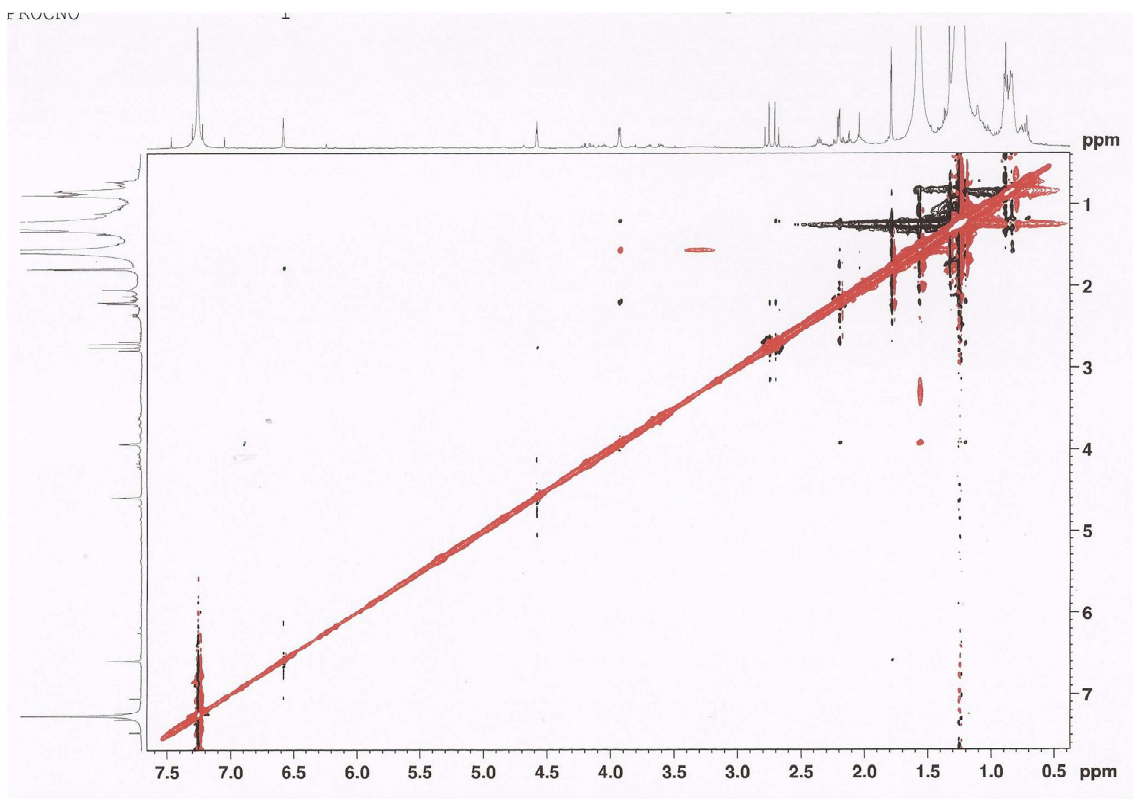

**Figure S9.** Expansion of ROESY spectrum of **1** (CDCl<sub>3</sub>, 500 MHz).

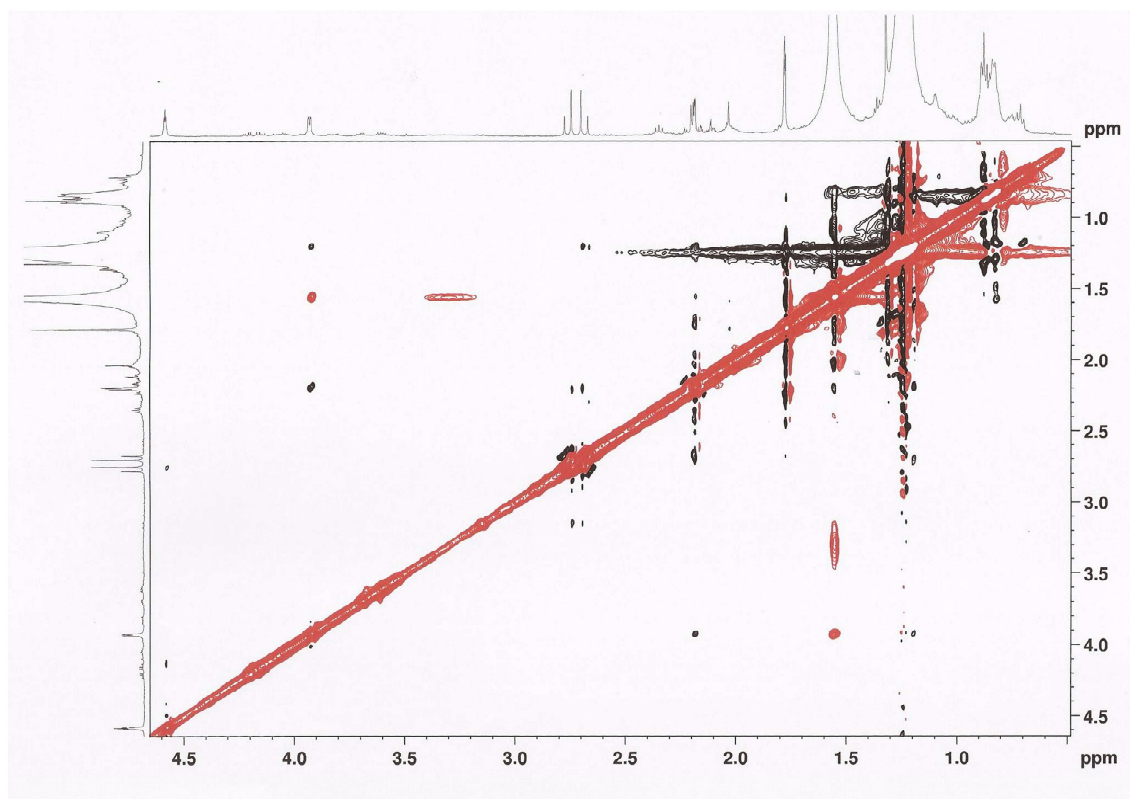

**Figure S10.** (+)-HRESIMS of **1**.

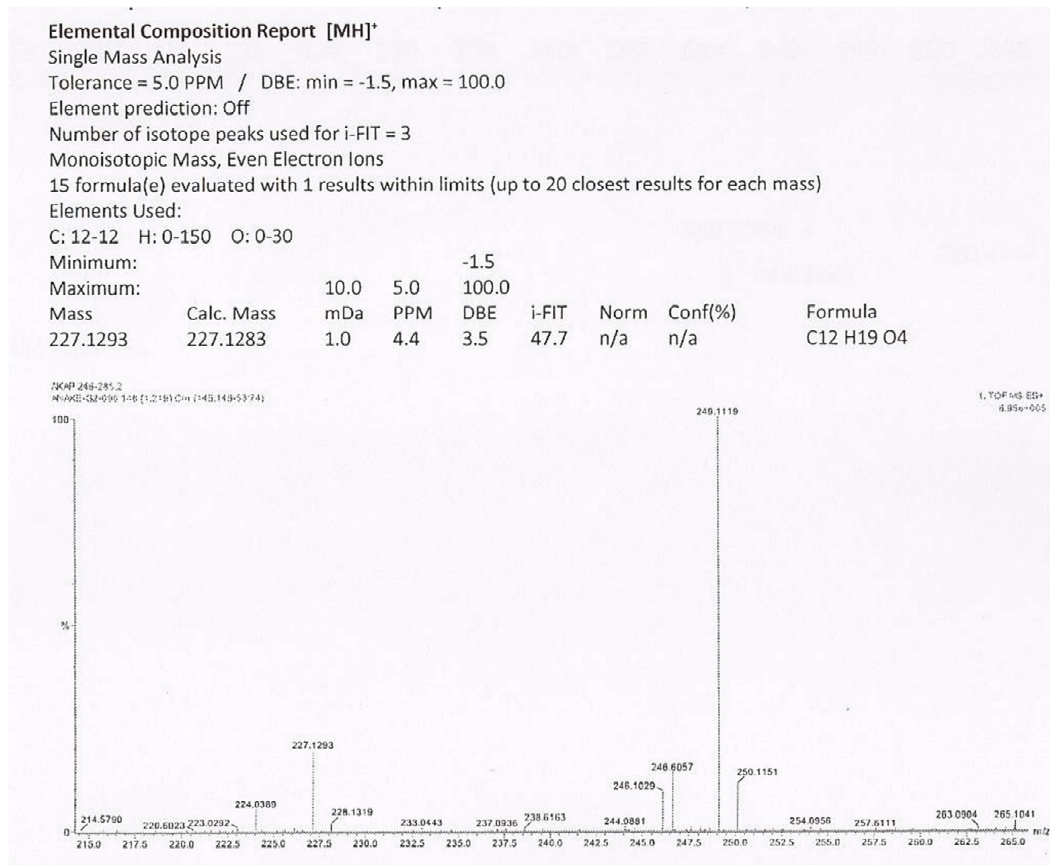

**Figure S11.**  $^1\text{H}$  NMR spectrum of **2** ( $\text{DMSO-d}_6$ , 300.13 MHz) before purification.

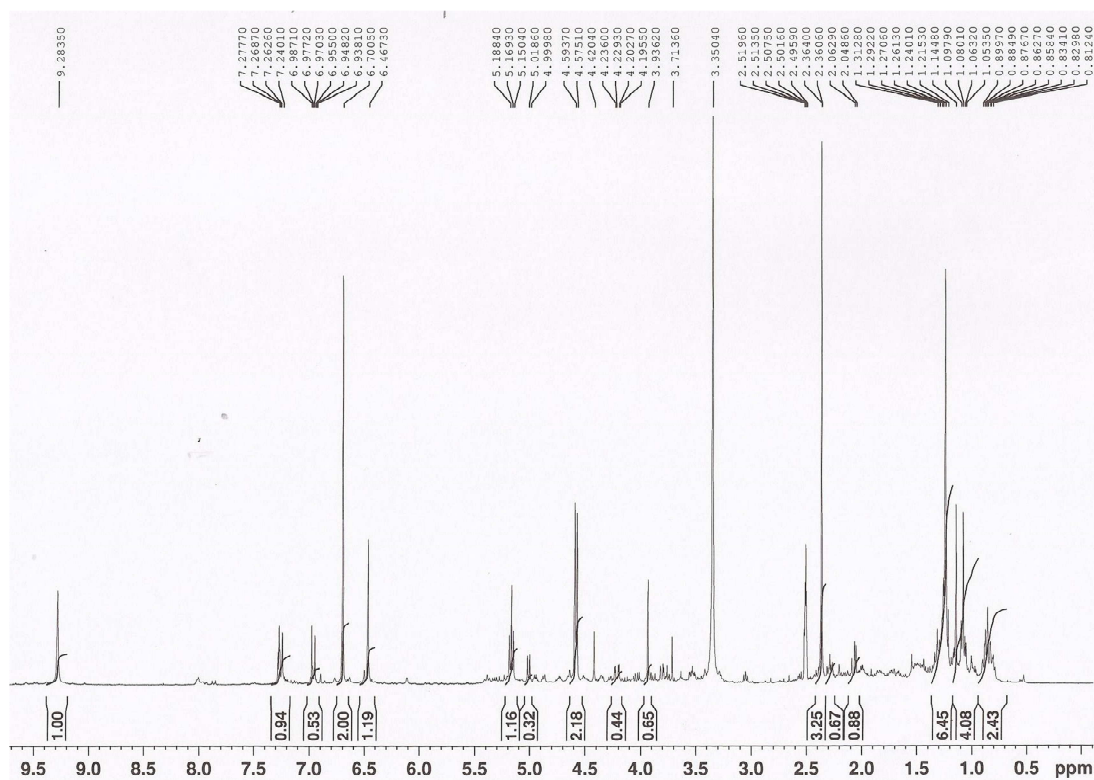

**Figure S12.**  $^{13}\text{C}$  NMR spectrum of **2** ( $\text{DMSO-d}_6$ , 75.4 MHz) before purification.

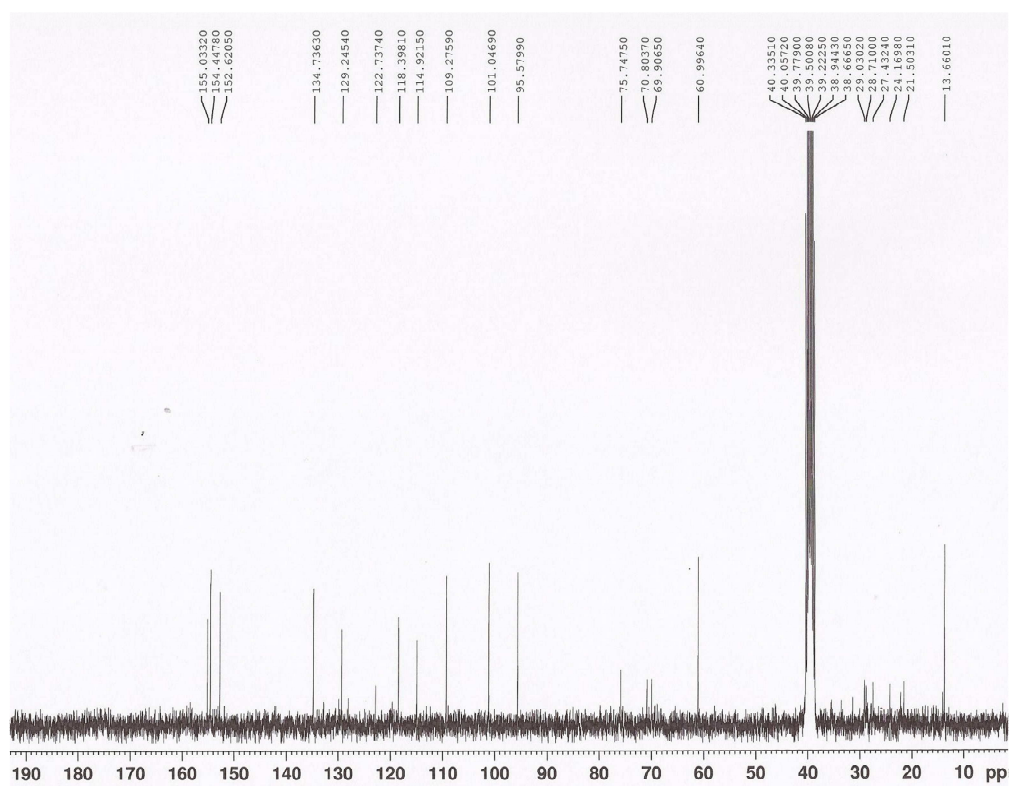

**Figure S13.** DEPT 135° spectrum of **2** (DMSO-d<sub>6</sub>, 75.4 MHz) before purification.

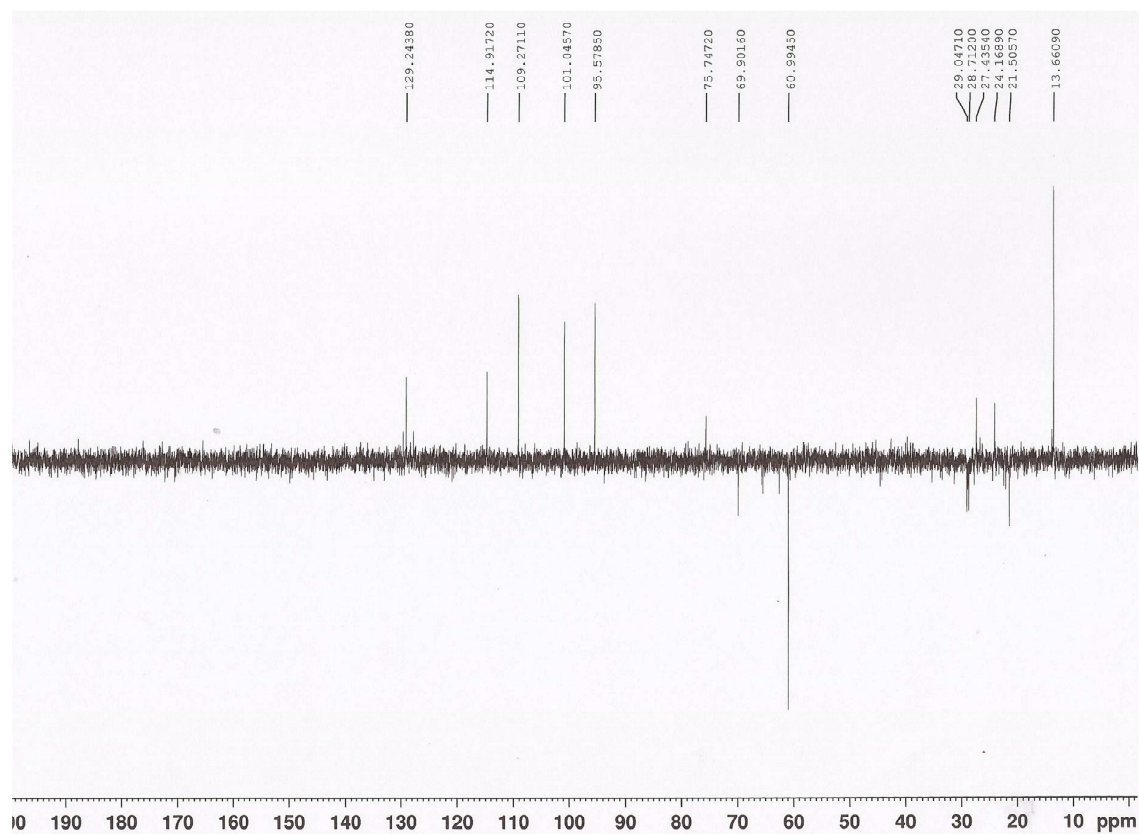

**Figure S14.** DEPT 90° spectrum of **2** (DMSO-d<sub>6</sub>, 75.4 MHz) before purification.

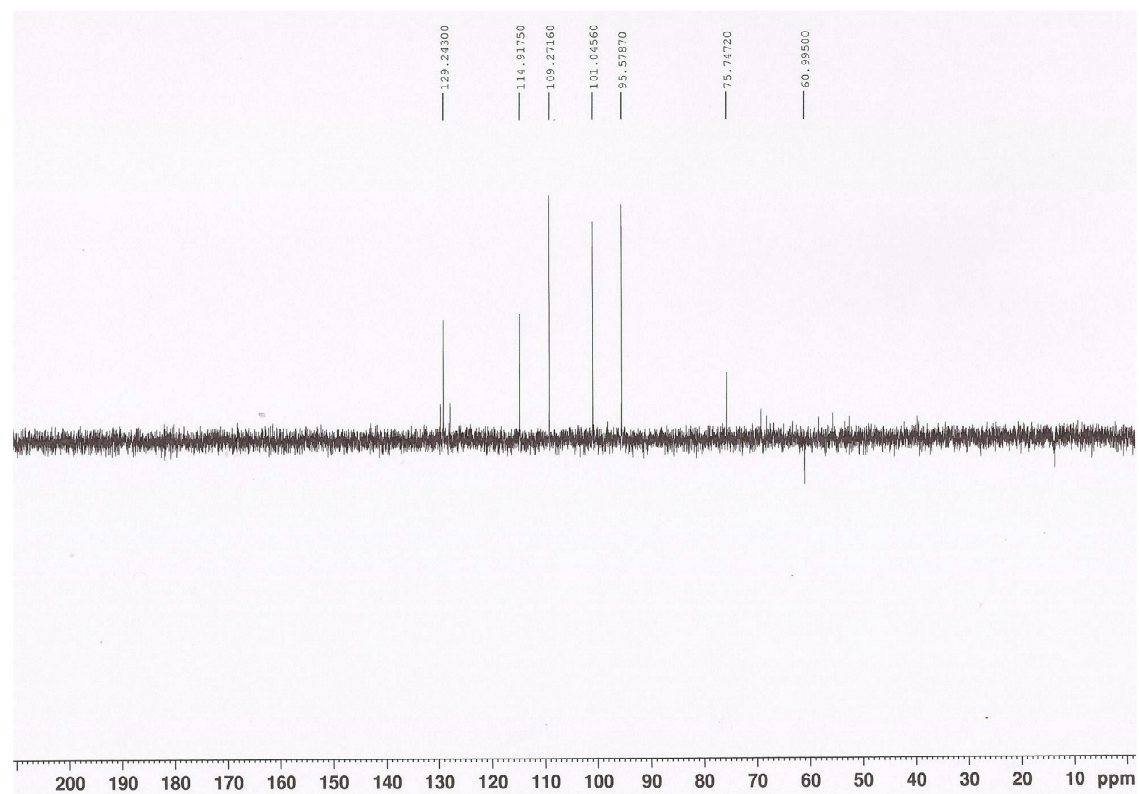



**Figure S15.** COSY spectrum of **2** (DMSO-d<sub>6</sub>, 300.13 MHz) before purification.

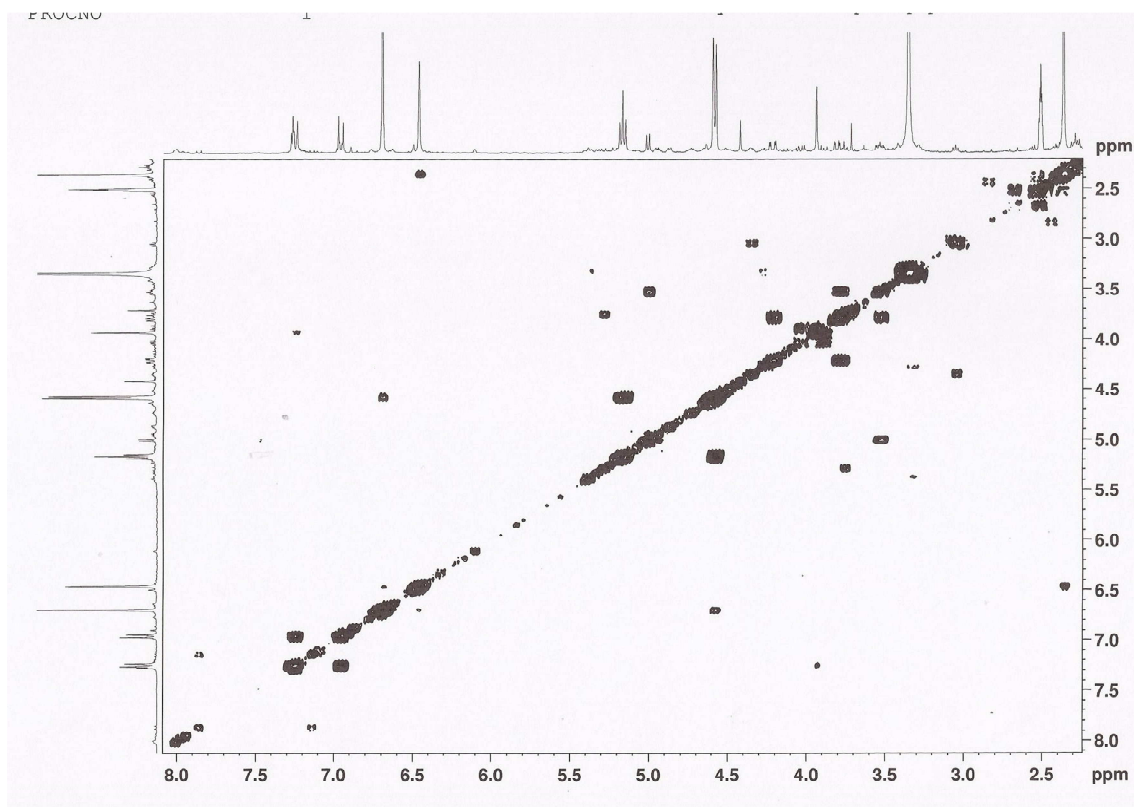

**Figure S16.** HSQC spectrum of **2** (DMSO-d<sub>6</sub>, 300.13 MHz) before purification.

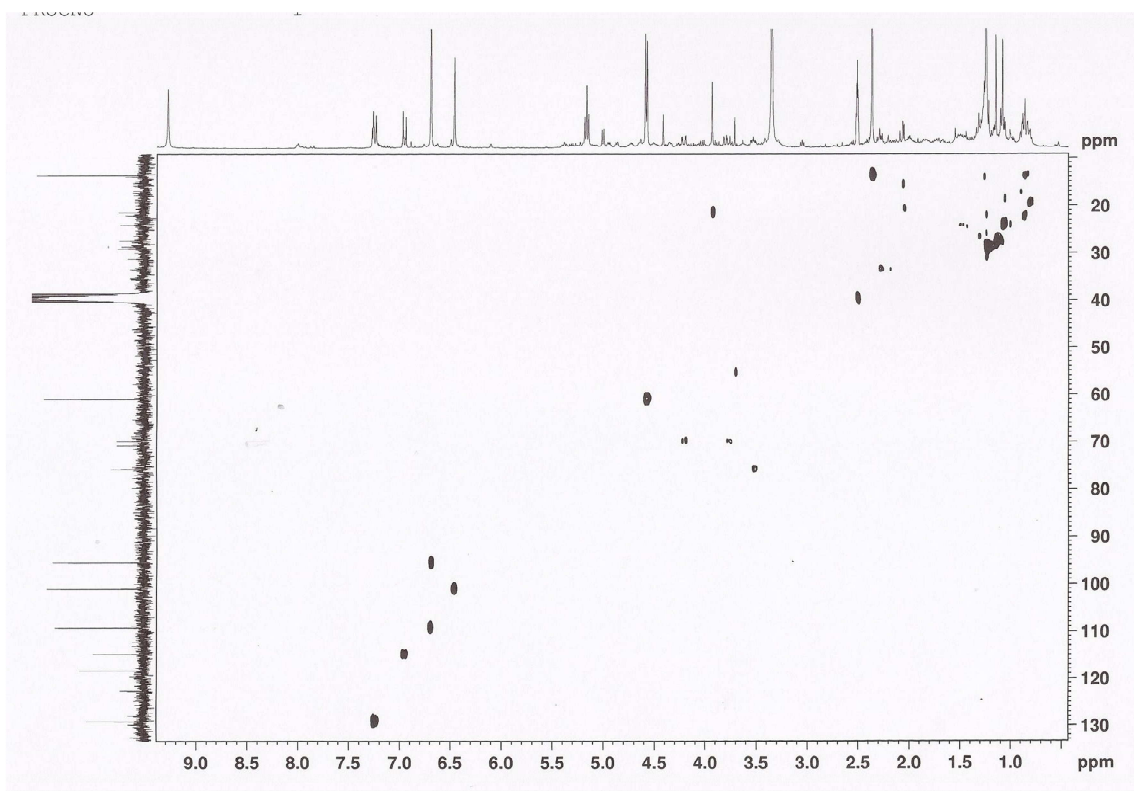

**Figure S17.** HMBC spectrum of **2** (DMSO-d<sub>6</sub>, 300.13 MHz) before purification.

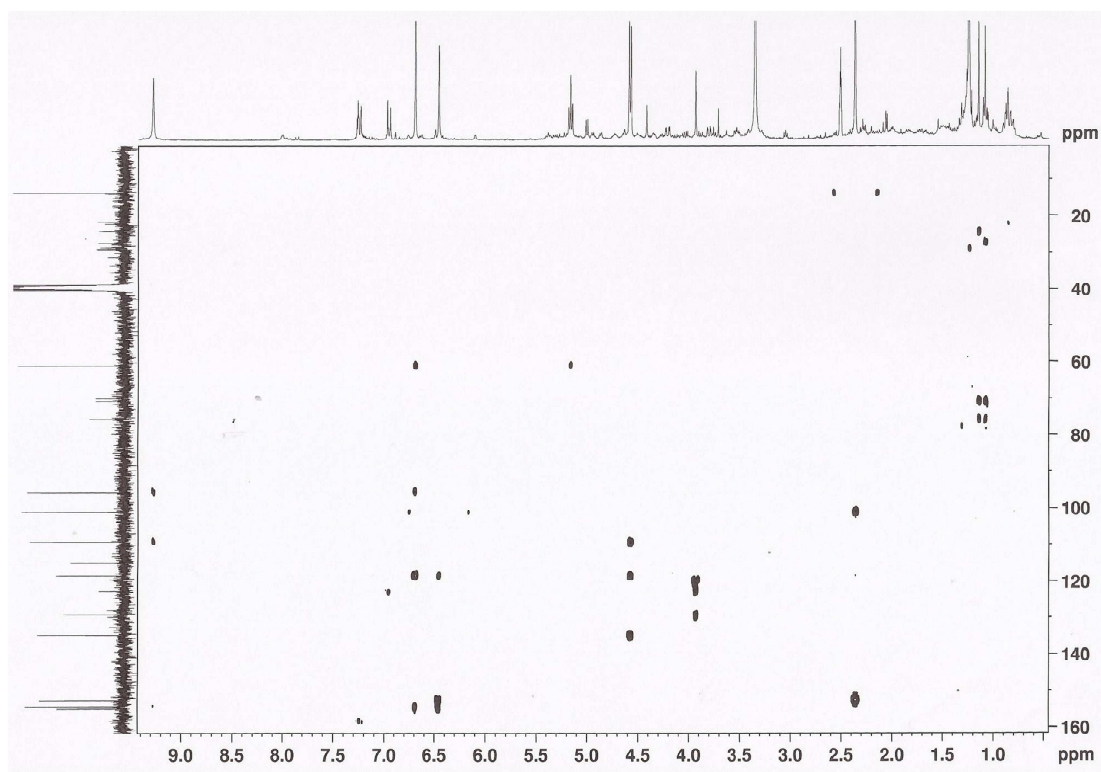

**Figure S18.** <sup>1</sup>H NMR spectrum of **2** (DMSO-d<sub>6</sub>, 300.13 MHz) after purification.

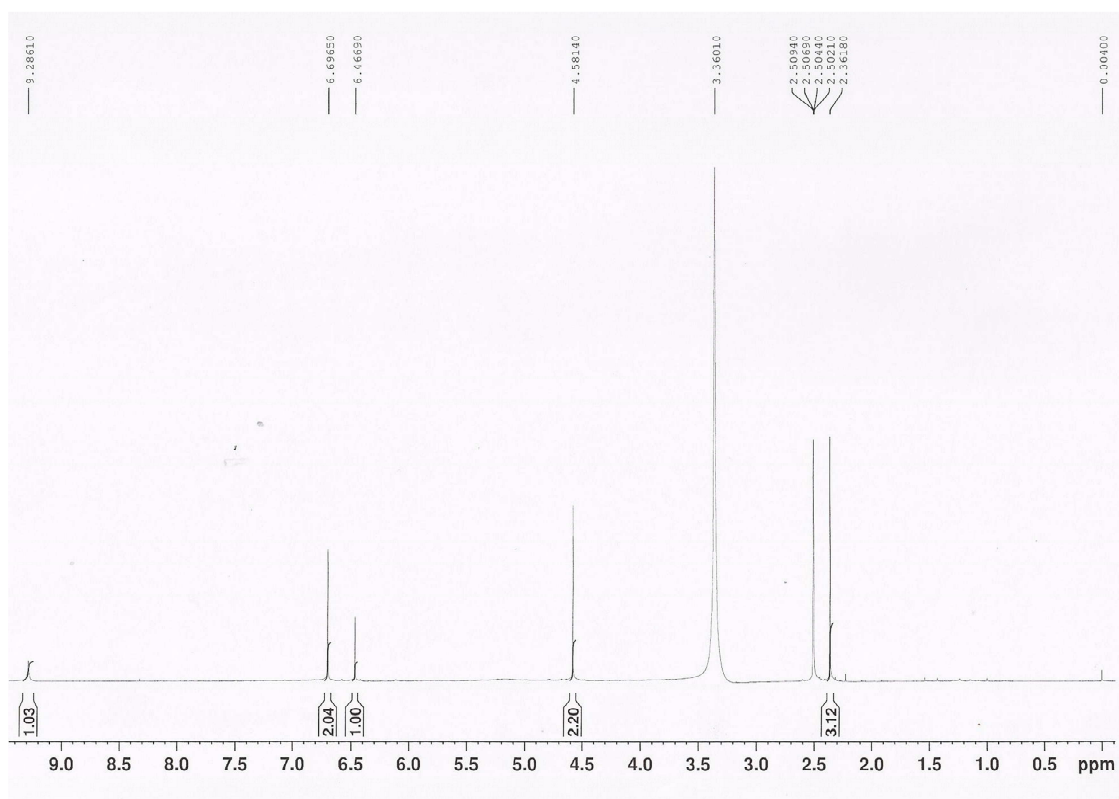

**Figure S19.**  $^{13}\text{C}$  NMR spectrum of **2** (DMSO- $d_6$ , 75.4 MHz) after purification.

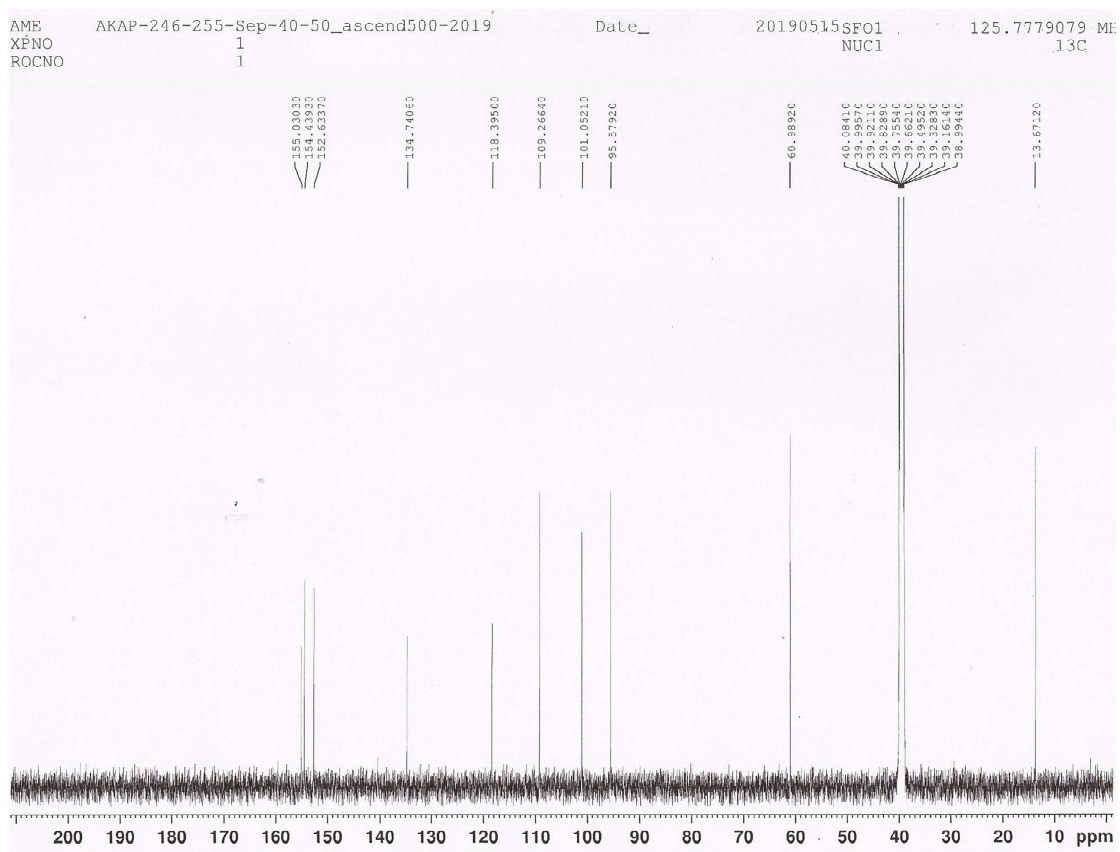

**Figure S20.** HSQC spectrum of **2** (DMSO- $d_6$ , 300.13 MHz) after purification.

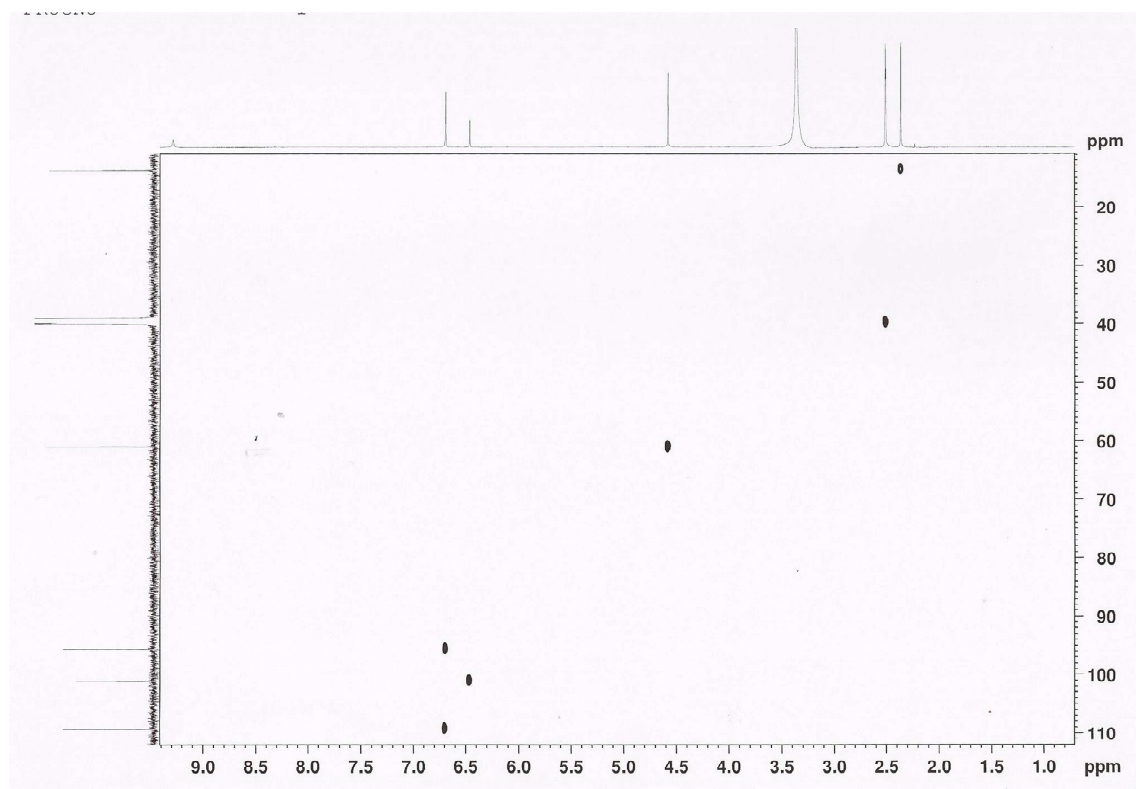

**Figure S21.** HMBC spectrum of **2** (DMSO-d<sub>6</sub>, 300.13 MHz) after purification.

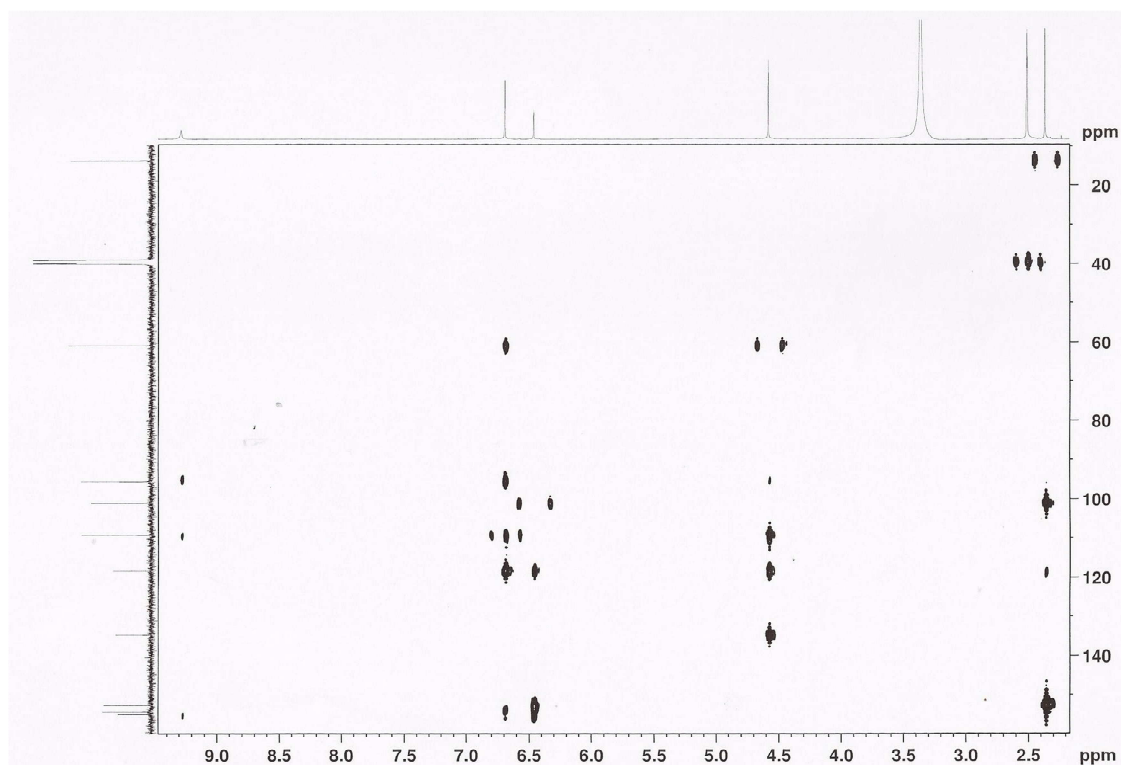

**Figure S 22.** (-)-HRESIMS of **2** after purification.

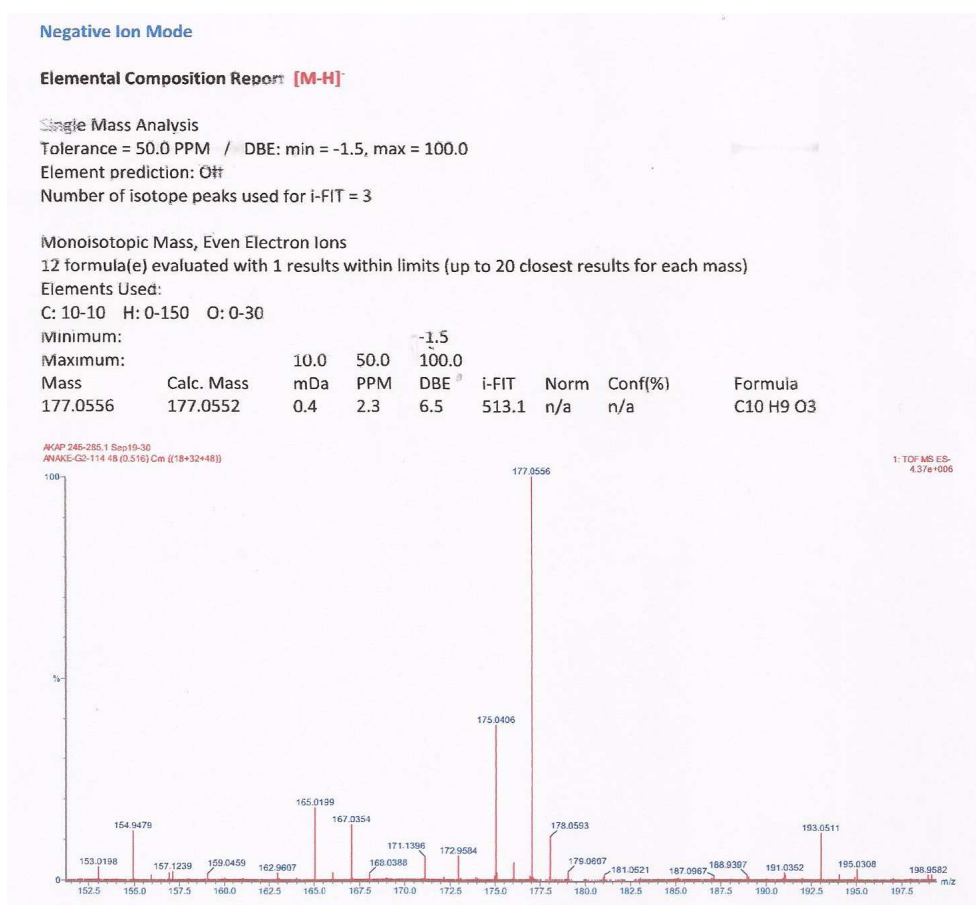

**Figure S23.**  $^1\text{H}$  NMR spectrum of **3** (DMSO- $d_6$ , 500 MHz).

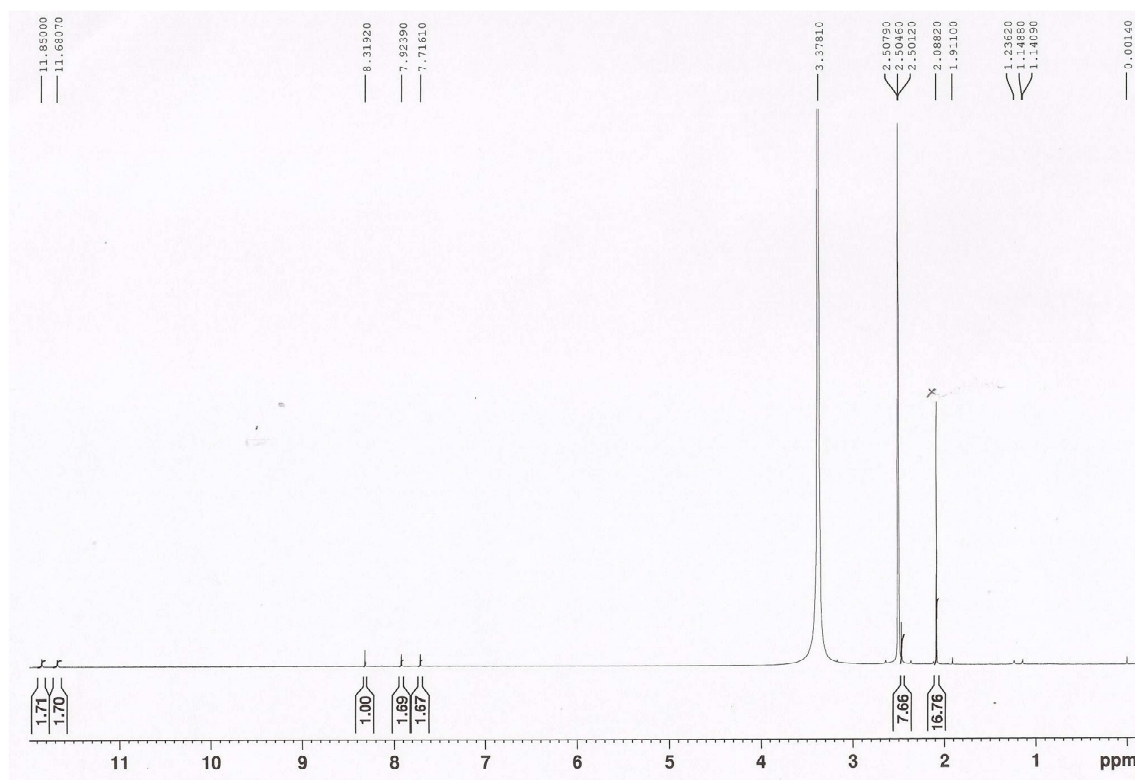

**Figure S24.**  $^{13}\text{C}$  NMR spectrum of **3** (DMSO- $d_6$ , 125 MHz).

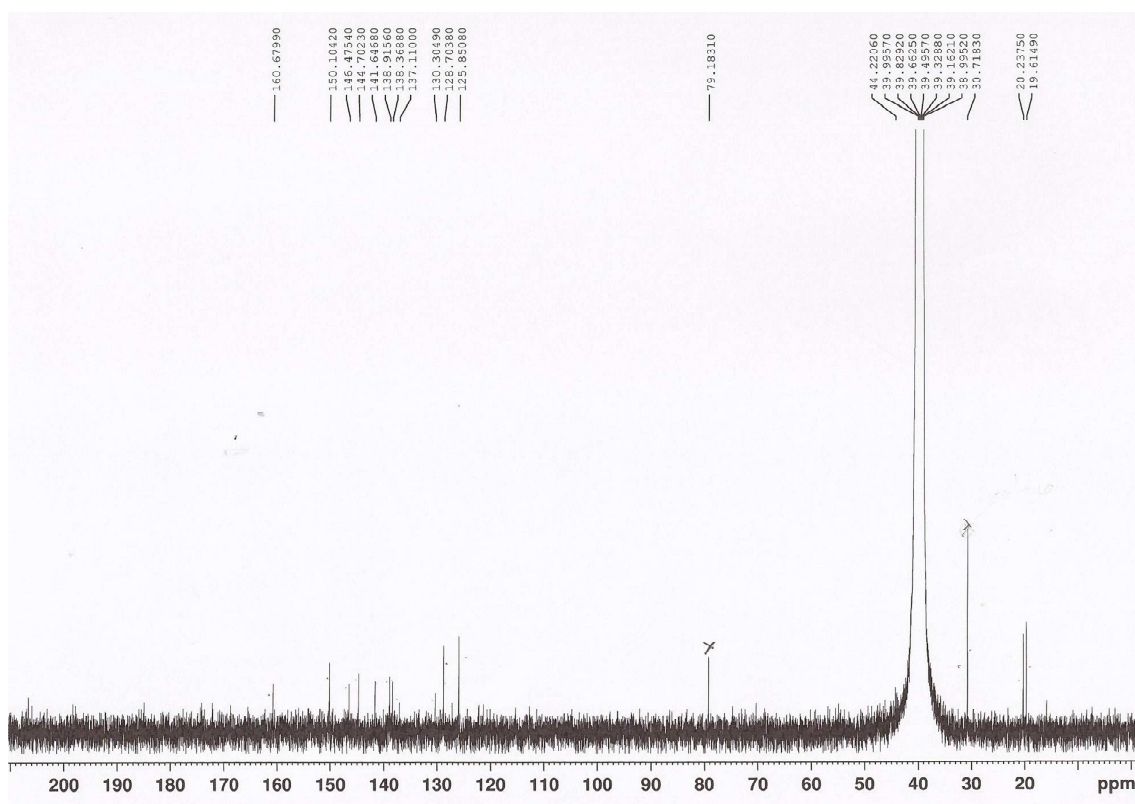

**Figure S25.** DEPT 135° spectrum of **3** (DMSO-d<sub>6</sub>, 125 MHz).

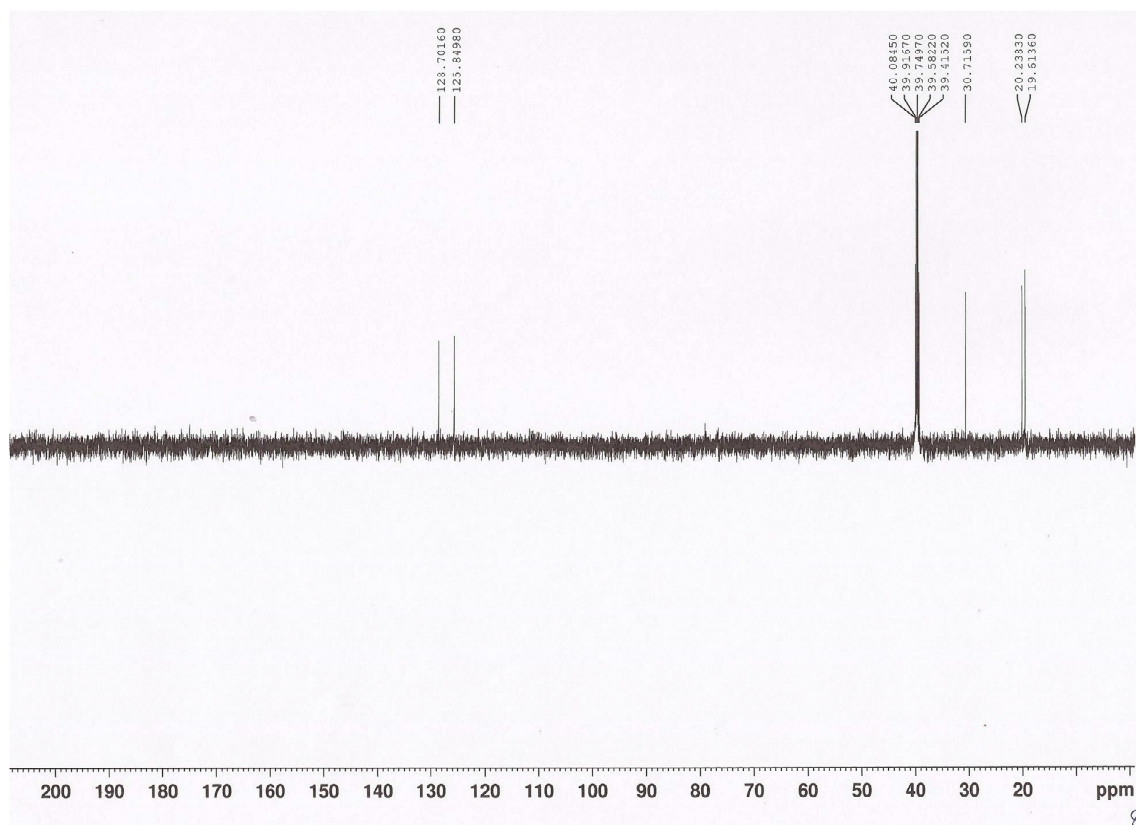

**Figure S26.** DEPT 90° spectrum of **3** (DMSO-d<sub>6</sub>, 125 MHz).

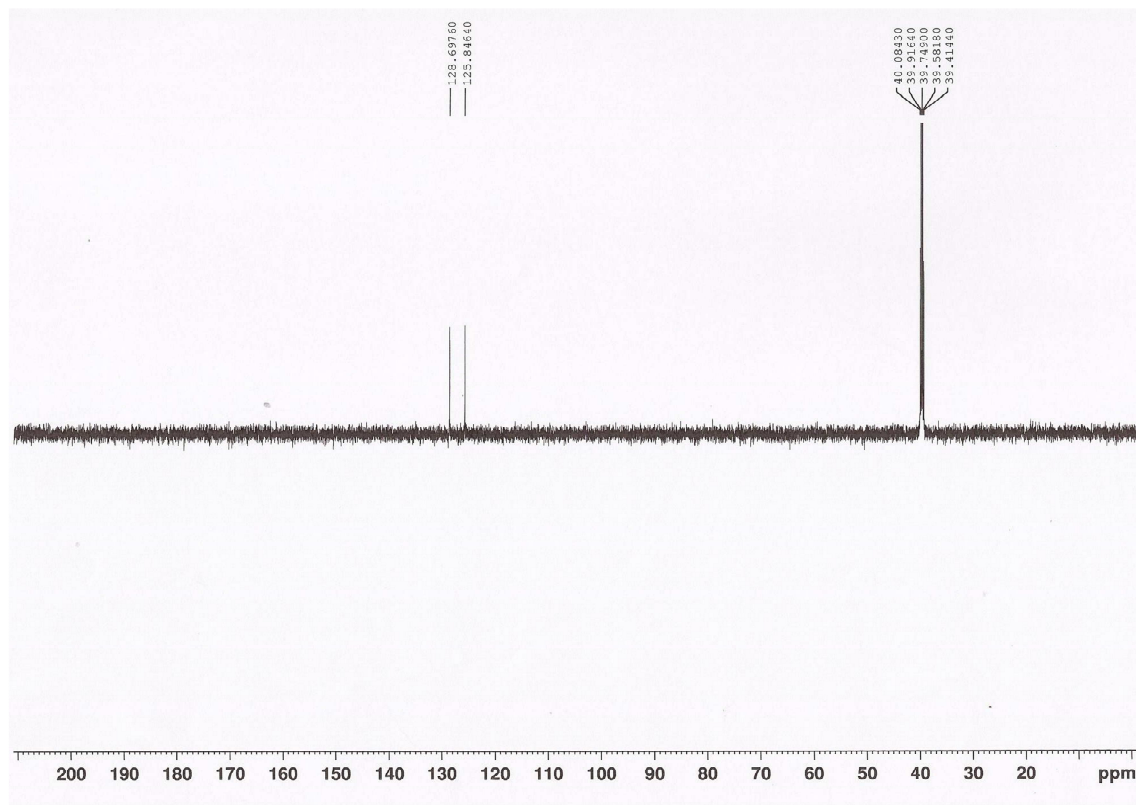

**Figure S27.** HSQC spectrum of **3** (DMSO-d<sub>6</sub>, 125 MHz).

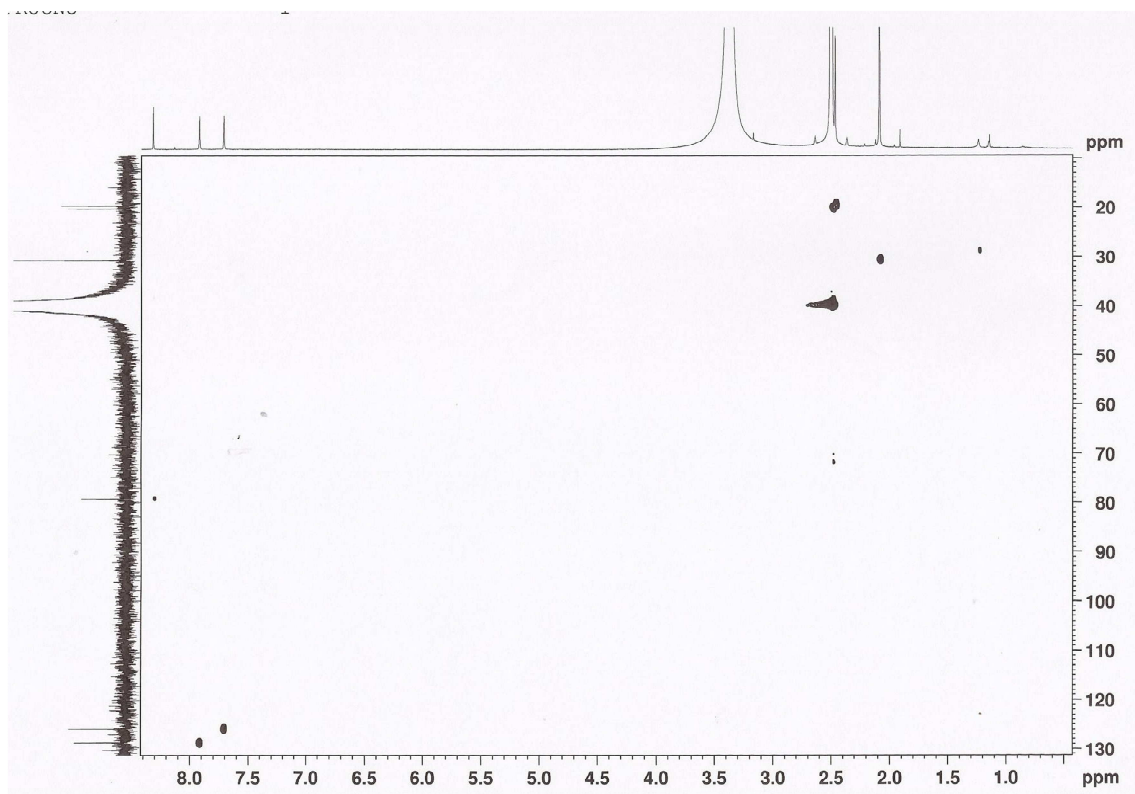

**Figure S28.** HMBC spectrum of **3** (DMSO-d<sub>6</sub>, 125 MHz).

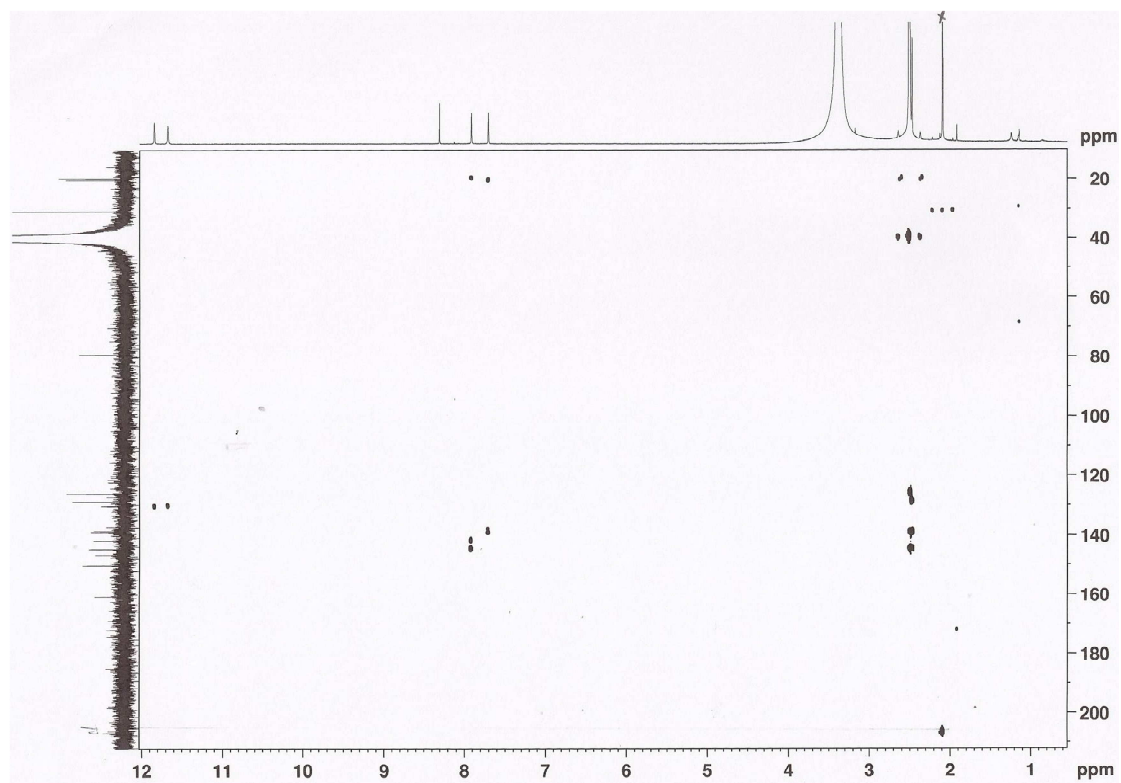

**Figure S 29. (+)-HRESIMS of 3.**

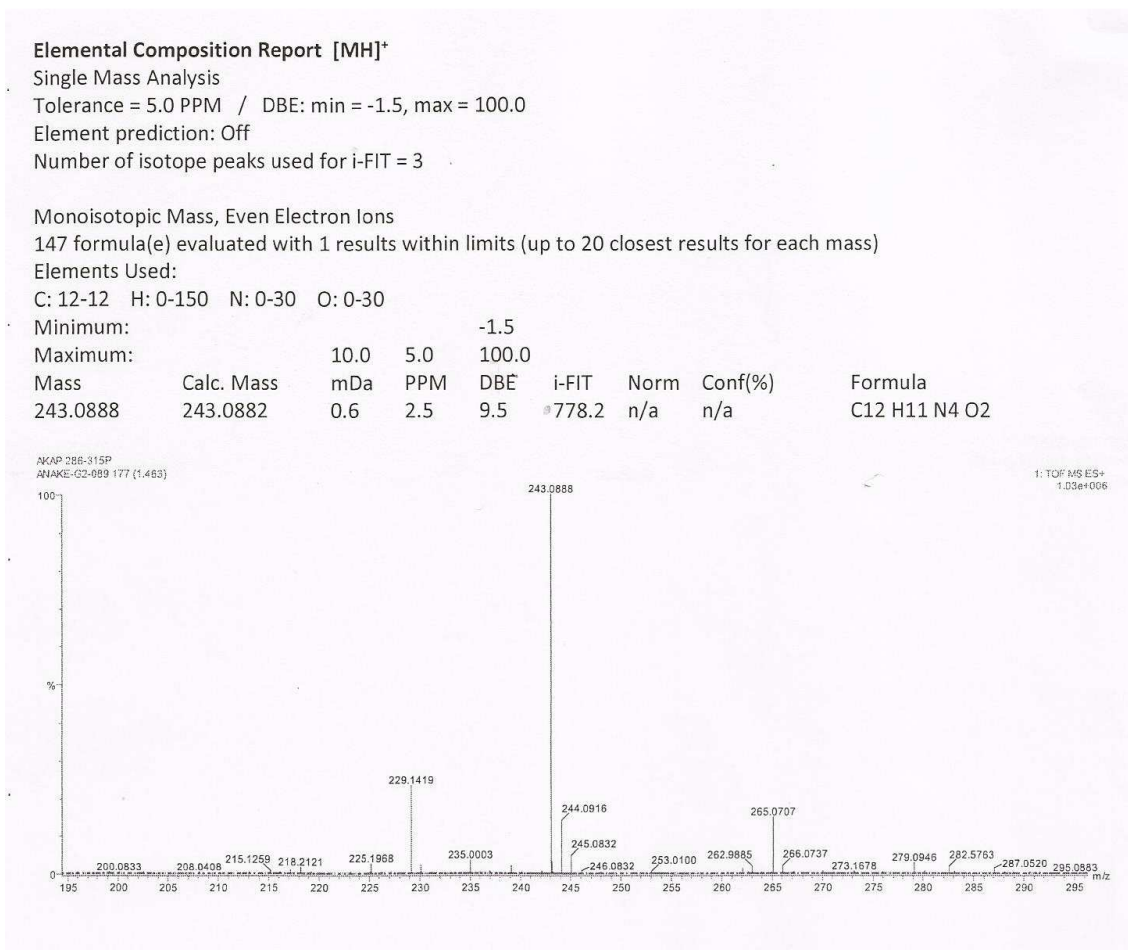

**Figure S 30. <sup>1</sup>H NMR spectrum of 4 (CDCl<sub>3</sub>, 300.13 MHz).**

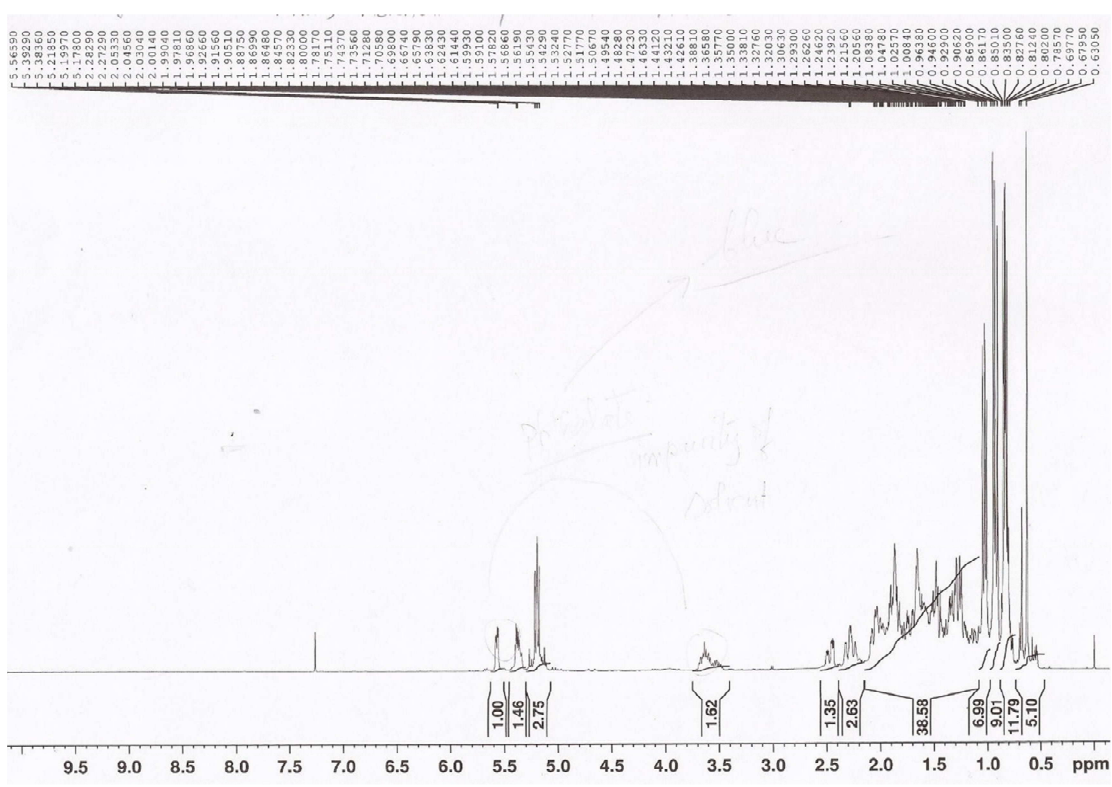



Figure S31.  $^{13}\text{C}$  NMR spectrum of **4** ( $\text{CDCl}_3$ , 75.4 MHz).

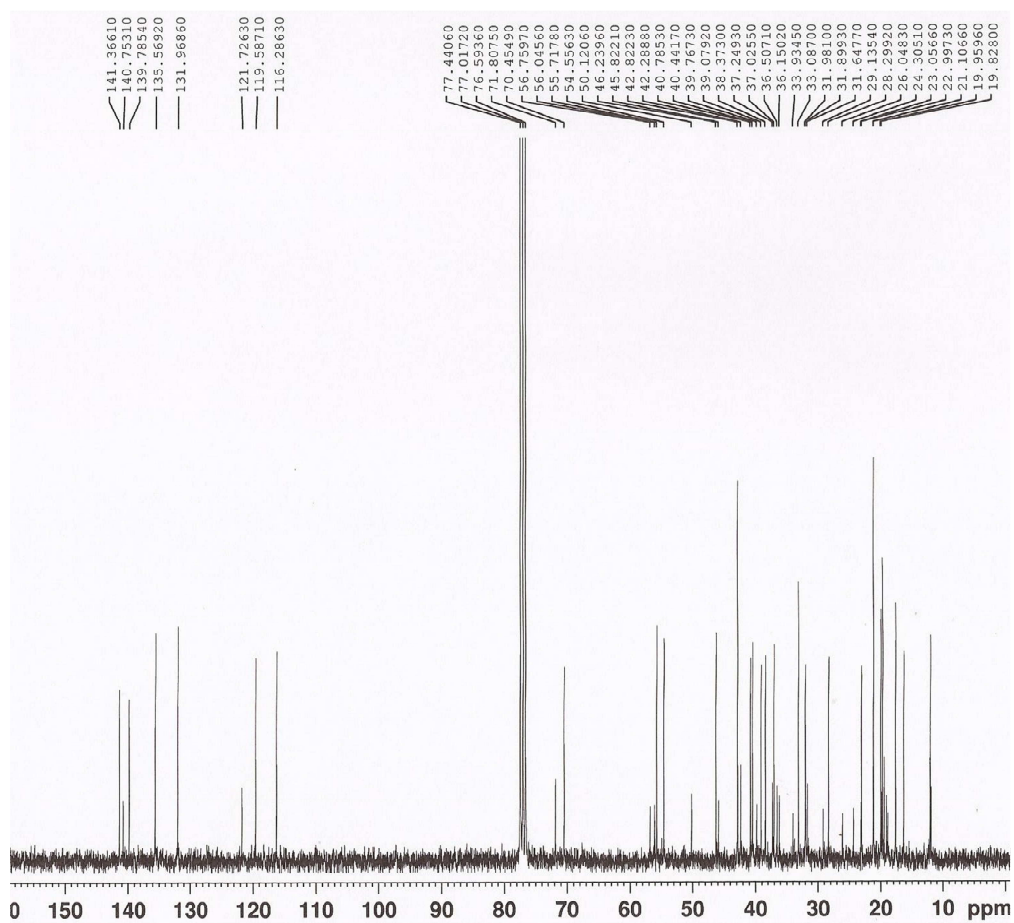

Figure S32.  $^1\text{H}$  NMR spectrum of **5** ( $\text{CDCl}_3$ , 300.13 MHz).

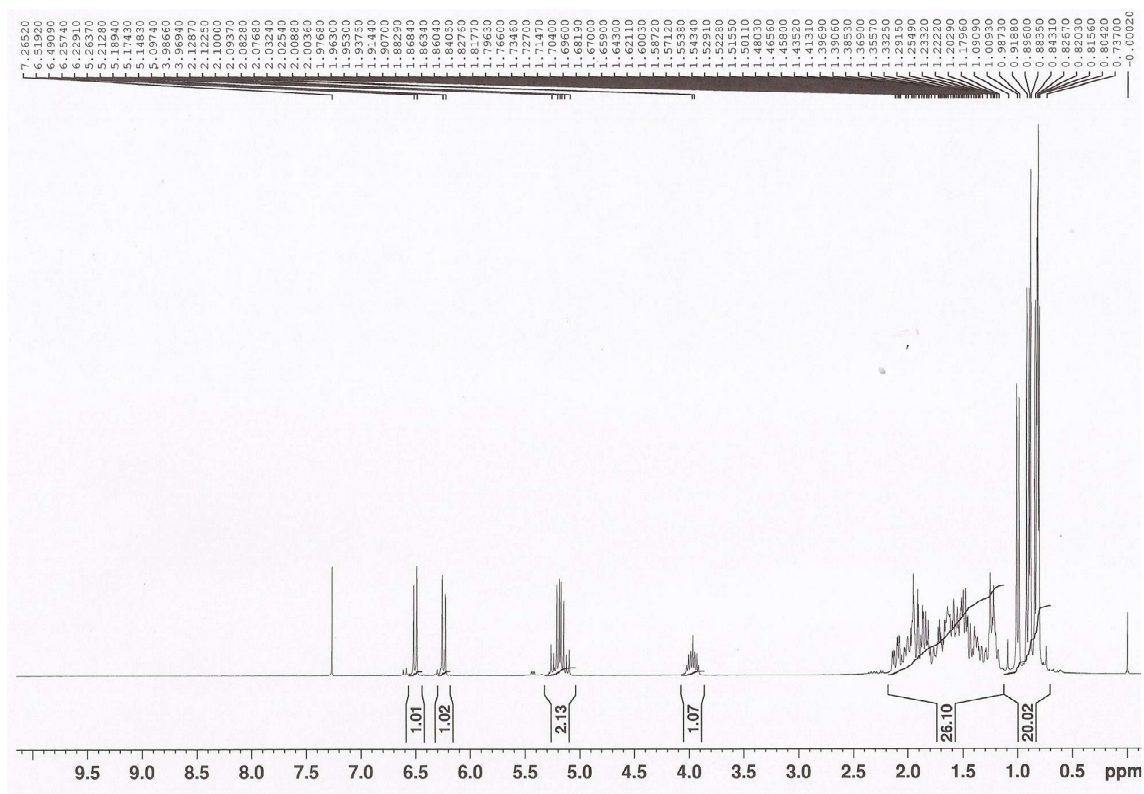

**Figure S33.**  $^1\text{H}$  NMR spectrum of **5** ( $\text{CDCl}_3$ , 300.13 MHz).

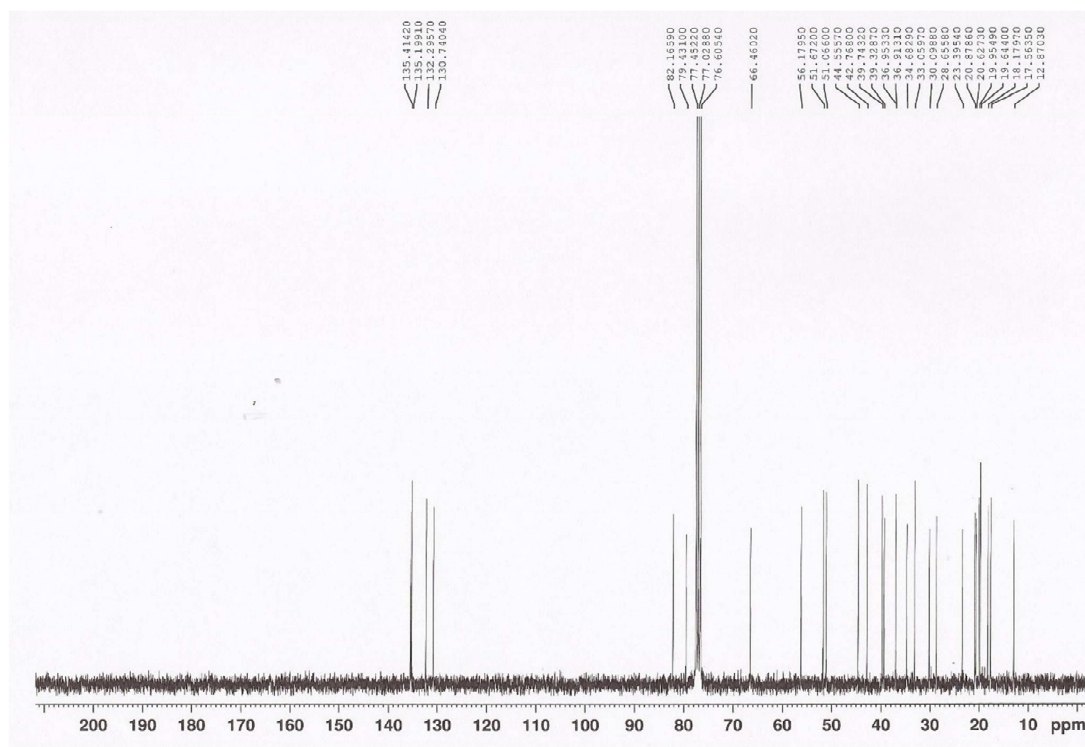

**Table 1S.**  $^1\text{H}$  and  $^{13}\text{C}$  NMR ( $\text{DMSO-d}_6$ , 500 and 125 MHz) for lumichrome (**3**).

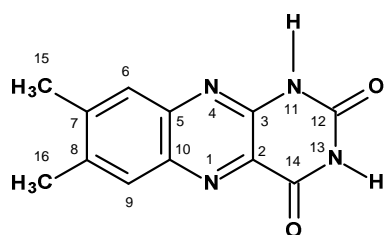

| Position | $\delta_{\text{C}}$ , type | $\delta_{\text{H}}$ , ( $J$ in Hz) |
|----------|----------------------------|------------------------------------|
| 2        | 130.2, C                   | -                                  |
| 3        | 146.5, C                   | -                                  |
| 5        | 138.9, C                   | -                                  |
| 6        | 128.7, CH                  | 7.92, s                            |
| 7        | 138.3, C                   | -                                  |
| 8        | 144.7, C                   | -                                  |
| 9        | 125.8, CH                  | 7.71, s                            |
| 10       | 141.6, C                   | -                                  |
| 12       | 150.1, CO                  | -                                  |
| 14       | 160.7, CO                  | -                                  |
| 15       | 19.6, $\text{CH}_3$        | 2.47, s                            |
| 16       | 20.2, $\text{CH}_3$        | 2.50, s                            |
| NH-11    | -                          | 11.84, brs*                        |
| NH-13    | -                          | 11.69, brs*                        |

\*interchangeable
